# Supplementary material for: Regulating a Post-Transcriptional Regulator: Protein Phosphorylation, Degradation and Translational Blockage in Control of the Trypanosome Stress-Response RNA-Binding Protein ZC3H11
Source: PubMed Central journal article supplement (PMC4803223; doi:10.1371/journal.ppat.1005514), 2016-03-22

**A**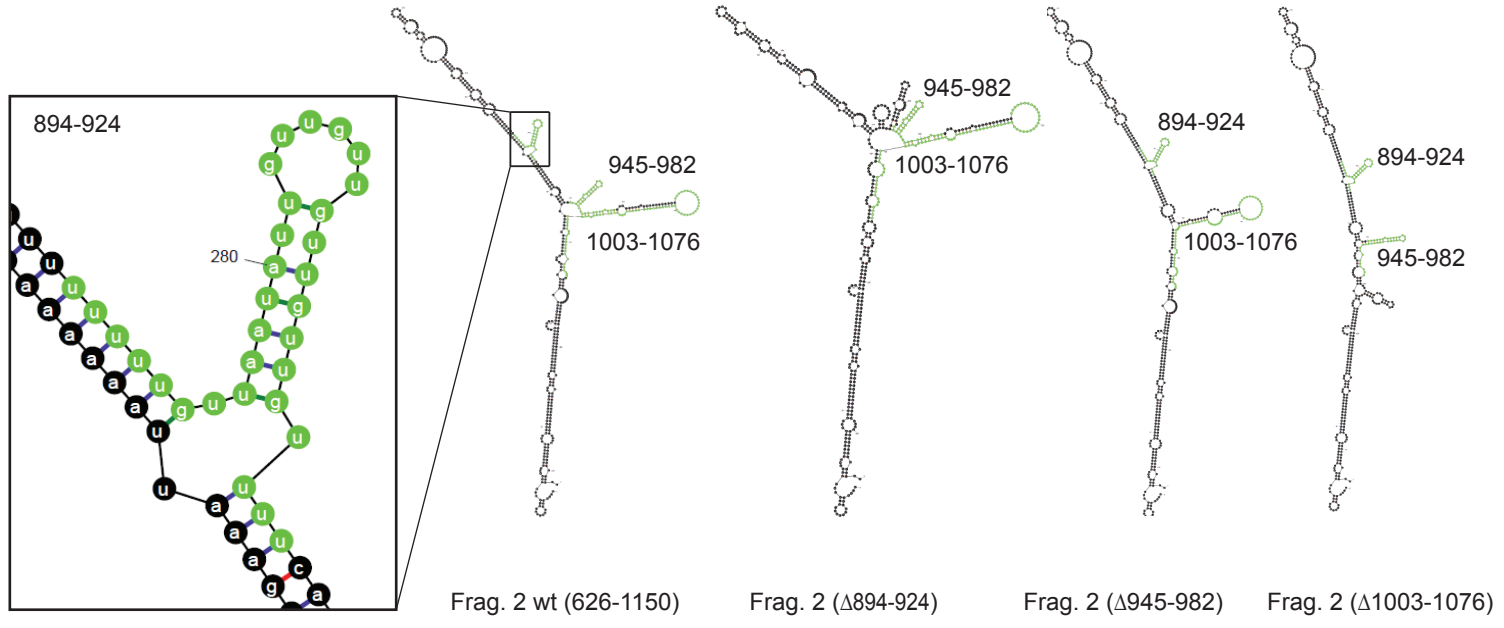**B**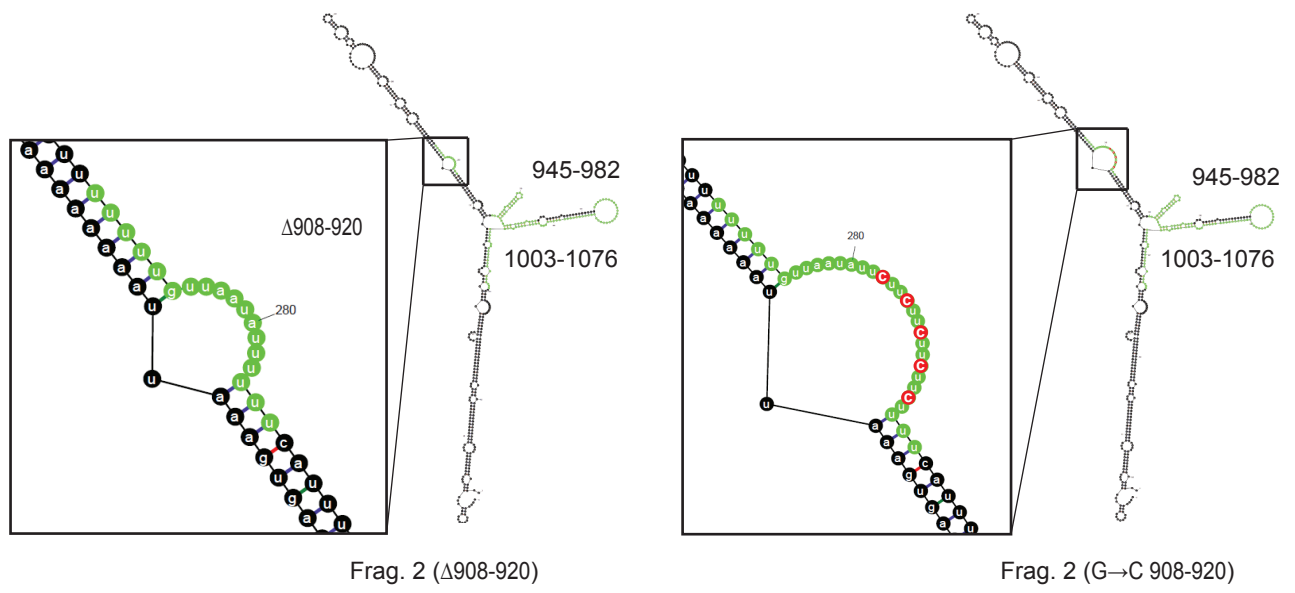

Supplement: ppat.1005514.s006.pdf [file ppat.1005514.s006.pdf]
